# Supplementary material
Source: MDPI journal article supplement (https://www.mdpi.com/1424-8247/14/10/975)
Supplement: s1 [file s1]

**Supplemental Material**  
**Figure S1**  
**BPF: Bergamot Polyphenolic Fraction**  
**Specification sheet**

| DESCRIPTION                                                                 | SPECIFICATIONS                 | METHODS                    |
|-----------------------------------------------------------------------------|--------------------------------|----------------------------|
| Botanical Source                                                            | Citrus Bergamia Risso et Poit. |                            |
| Family                                                                      | Rutaceae                       |                            |
| Synonyms                                                                    | Citrus aurantium var. bergamia |                            |
| Country of Origin                                                           | Calabria, Italy                |                            |
| Part Used                                                                   | Fruit                          |                            |
| Shelf Life                                                                  | 3 years, if correctly stored   |                            |
| <b>ORGANOLEPTIC</b>                                                         |                                |                            |
| Colour                                                                      | Yellow Powder                  | visual (CQ-MO-148)         |
| Odour                                                                       | Aromatic                       | visual (CQ-MO-148)         |
| Flavour                                                                     | Characteristic of bergamot     | sensory (CQ-MO-148)        |
| <b>CHEMICAL CHARACTERISTICS</b>                                             |                                |                            |
| pH                                                                          | 3.0 – 4.0                      | IM (0.5% in water) at 25°C |
| Average Mesh Size                                                           | Pass 70 mesh                   | Sieve: (CQ-MO-023)         |
| Bulk Density                                                                | 30-70g/100ml                   | PT CHIM 65 rev 0 2011      |
| Moisture Content                                                            | < 10.0%                        | ISTISAN 96/34, pag 7       |
| Organic Solvent Residue                                                     | None                           | GC: (CQ-MO-168)            |
| Soluble in 40°C H <sub>2</sub> O                                            | Good                           | visual: (CQ-MO-148)        |
| Soluble in 50% H <sub>2</sub> O + EtOH                                      | Good                           | visual: (CQ-MO-148)        |
| Active Ingredient Strength                                                  | HPLC                           |                            |
| Pesticides Residue                                                          | Negative                       | PT CHIM 69rev 02 011       |
| <b>ACTIVE INGREDIENTS</b>                                                   | <b>UNIT</b>                    | <b>RANGE</b>               |
| Polyphenols (Neohesperidin, Naringin, Neohesperidin, Melitidin, Bruteridin) | %                              | 38%                        |

| <b>HEAVY METALS</b>        |     |       |
|----------------------------|-----|-------|
| Arsenic                    | ppm | <2.0  |
| Lead                       | ppm | <2.0  |
| Heavy Metals (tot. amount) | ppm | <20.0 |

| <b>MICROBIOLOGICAL EVALUATION</b> |              |                        |
|-----------------------------------|--------------|------------------------|
| Aerobic Plate Count               | <1,000 CFU/g | ISO 4833-1:2013        |
| Yeast and Mold Count              | <100 CFU/g   | ISO 21527-1:2008       |
| E. Coli                           | Negative     | ISO 16694-2:2001       |
| Coliform                          | Negative     | ISO 4832:2006          |
| Salmonella                        | Negative     | UNI EN ISO 6579:2000   |
| Staphylococcus Aureus             | Negative     | UNI EN ISO 6888-2:2004 |
| Streptococci                      | Negative     | PT BAT26 rev0 02012    |
| <b>PRODUCT TREATMENT</b>          |              |                        |
| Extraction solvents               | Water+KOH    |                        |
| Drying Method                     | Sprydry      |                        |
